# Supplementary material for: Adolescent Alcohol Drinking Renders Adult Drinking BLA-Dependent: BLA Hyper-Activity as Contributor to Comorbid Alcohol Use Disorder and Anxiety Disorders
Source: MDPI journal article supplement (doi:10.3390/brainsci7110151), 2017-11-14
Supplement: s1 [file s1]

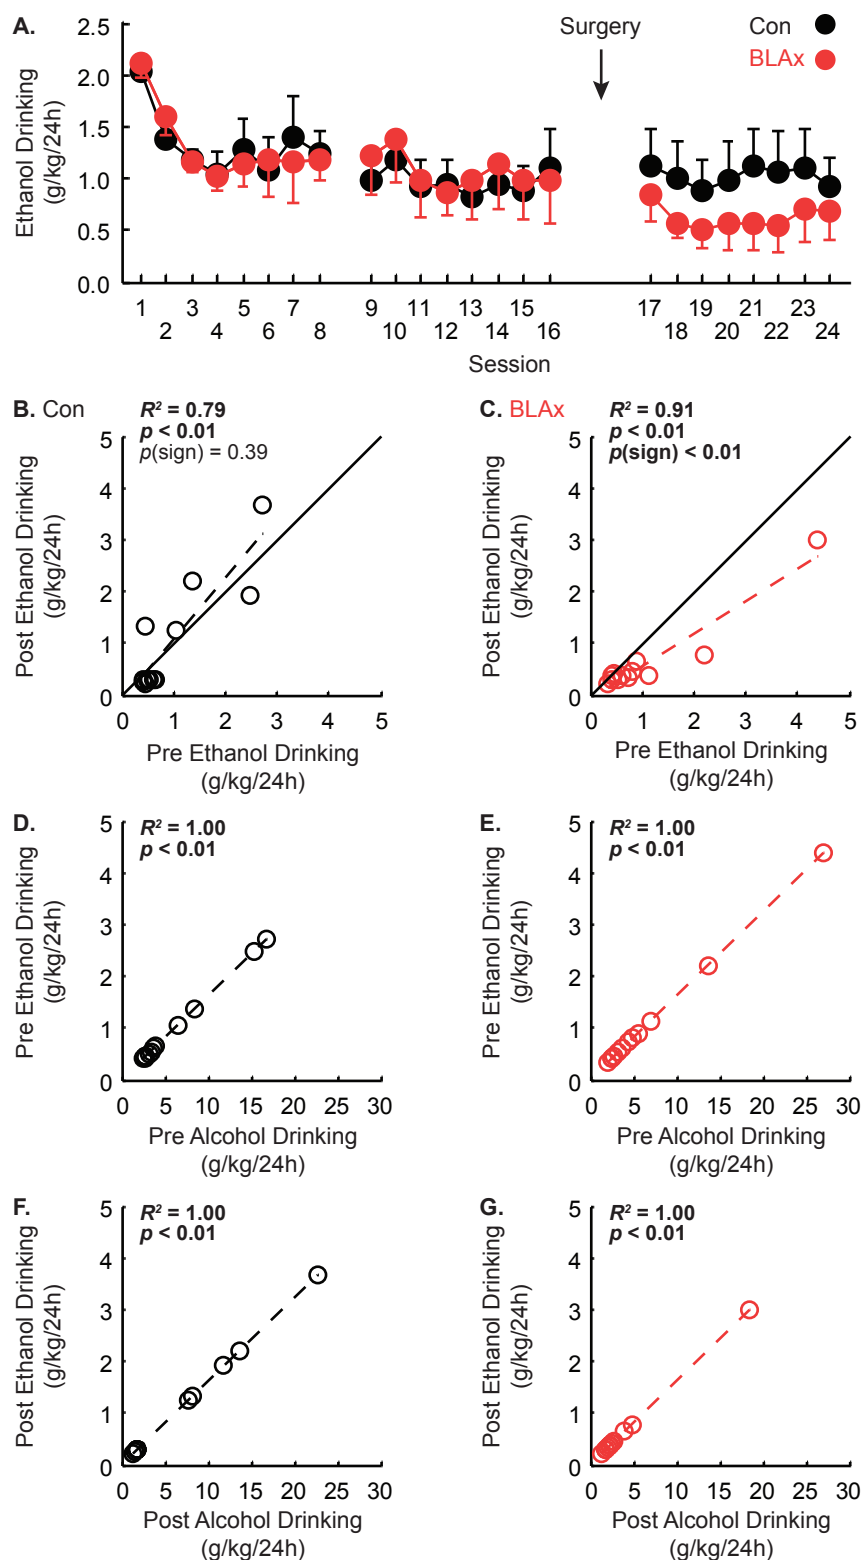

**Figure S1.** (A) Plotting ethanol drinking exactly as for alcohol drinking (Figure 2A) reveals an identical statistical pattern on a reduced y-axis scale. In support, ANOVA for ethanol drinking with lesion (Control vs. BLAx) and session (9-24) as factors, found a significant lesion x session interaction identical to that obtained for alcohol drinking ( $F_{15,330} = 2.05$ ,  $p = 0.01$ ). The relationship between pre-surgery and post-surgery ethanol drinking across all individuals for was identical to that obtained for alcohol drinking for (B) Controls (compare to Figure 3A) and (C) BLAx (compare to Figure 3C). Pre-surgery alcohol drinking (x-axis) and pre-surgery ethanol drinking (y-axis) were perfectly correlated for (D) Controls and (E) BLAx. Perfect correlations were also obtained for post-surgery drinking in (F) Controls and (G) BLAx.
